# Supplementary material for: Store-Operated Ca2+ Entry Contributes to Piezo1-Induced Ca2+ Increase in Human Endometrial Stem Cells
Source: MDPI journal article supplement (doi:10.3390/ijms23073763), 2022-03-29
Supplement: s1 [file s1]

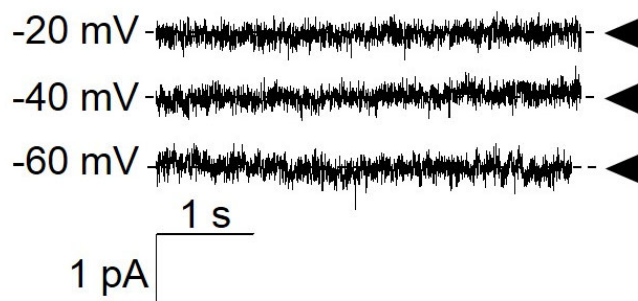

**Supplementary Figure S1.** Representative cell-attached current recordings (from  $n > 100$ ) demonstrating no background channel activity in the absence of Yoda1 in the pipette solution. Holding membrane potentials are indicated near traces, baseline indicates zero current level.

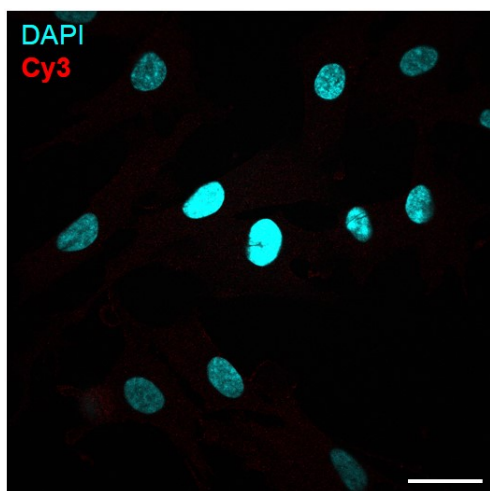

**Supplementary Figure S2.** No fluorescent staining of the cells is observed when cells were incubated only with secondary antibodies (1:200, GAR-Cy3, 1h at room temperature). Cell nuclei were counterstained with DAPI. The scale bar is 30  $\mu\text{M}$ .

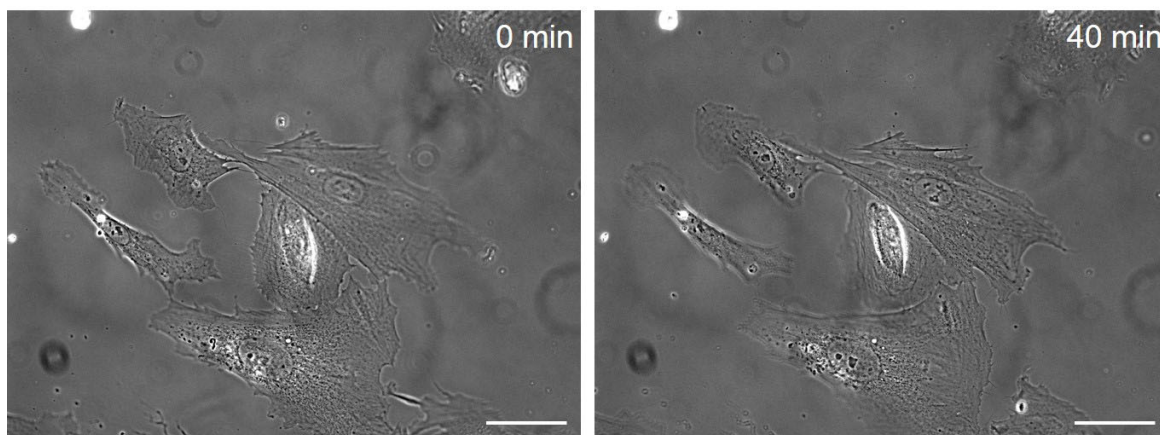

**Supplementary Figure S3.** Brightfield images of eMSCs demonstrating cell morphology before (0 min) after 40 min of  $[\text{Ca}^{2+}]_i$  imaging using UV light of 340/380 nm length. Imaging conditions are identical to those used for calcium measurements. Particularly, the cells were exposed every 5 sec to 400 ms of 340 nm UV and then 400 ms of 380 nm UV light. The scale bar is 50  $\mu\text{m}$ .

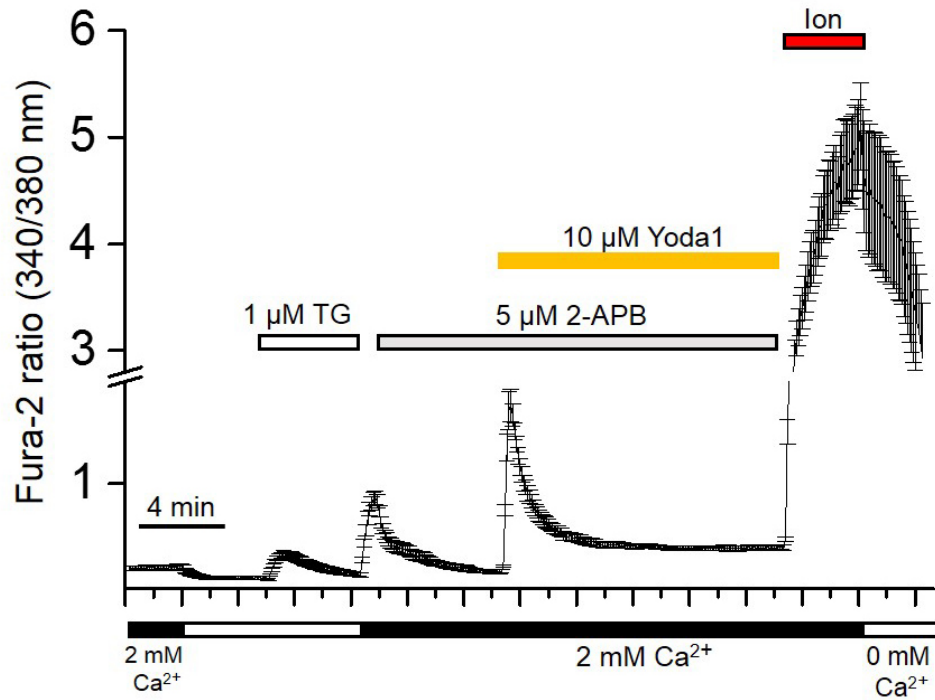

**Supplementary Figure S4.** Ionomycin (Ion, 10  $\mu$ M) further increased  $\text{Ca}^{2+}$  entry in cells after addition of Yoda1. Wash-out with  $\text{Ca}^{2+}$ -free solution resulted in interruption of Ionomycin-induced  $\text{Ca}^{2+}$  entry in eMSCs. Shown are typical  $\text{Ca}^{2+}$  responses from the representative experiment ( $n=4$ ).  $[\text{Ca}^{2+}]_i$  is plotted versus time. Each point is a mean  $\pm$  S.E. from 13 cells.

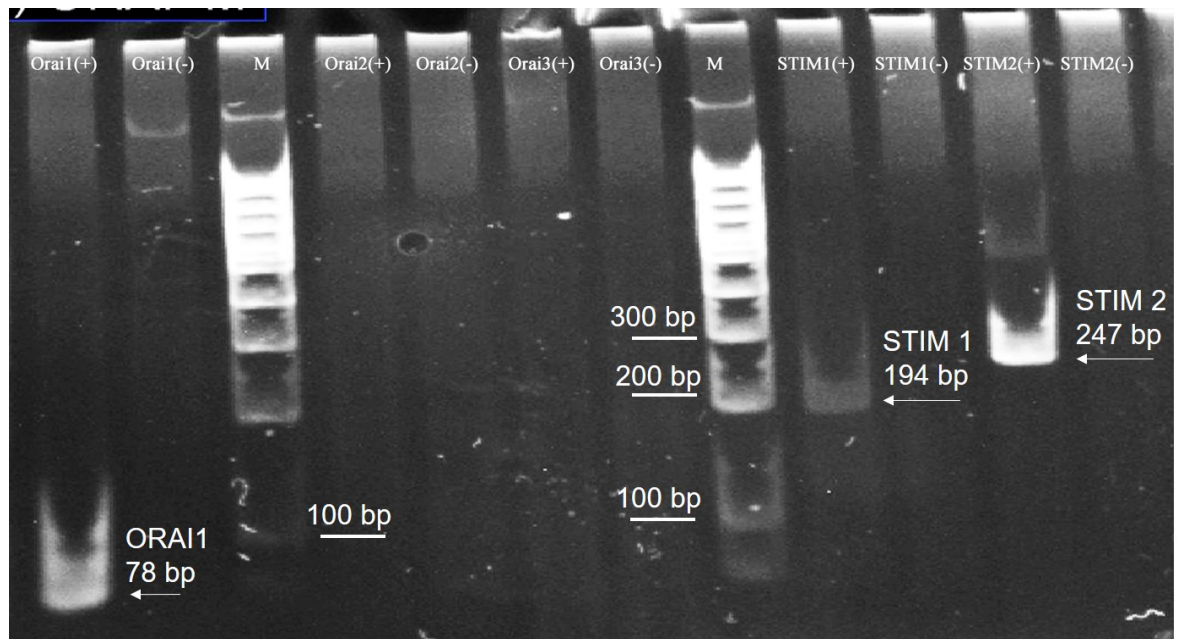

**Supplementary Figure S5.** Original gel demonstrating the presence of ORAI1, STIM1 and STIM2 and the absence of ORAI2 and ORAI3 transcripts in eMSCs.

|                  | The remaining wound sizes, in %.<br>mean $\pm$ S.E. M. |                  |                  | % of dead (PI-positive) cells,<br>mean $\pm$ S.D. |
|------------------|--------------------------------------------------------|------------------|------------------|---------------------------------------------------|
| Timepoints:      | 12 h                                                   | 24 h             | 36 h             | 48 h                                              |
| Control          | 61.77 $\pm$ 3.96                                       | 27.86 $\pm$ 5.08 | 1.53 $\pm$ 1.93  | 5.17 $\pm$ 1.61                                   |
| 1 $\mu$ M TG     | 68.35 $\pm$ 1.08                                       | 57.80 $\pm$ 4.92 | 43.11 $\pm$ 6.08 | 5.55 $\pm$ 1.78                                   |
| 10 $\mu$ M Yoda1 | 85.43 $\pm$ 1.87                                       | 63.76 $\pm$ 4.09 | 42.26 $\pm$ 5.26 | 5.99 $\pm$ 0.54                                   |
| 5 $\mu$ M 2-APB  | 75.18 $\pm$ 1.35                                       | 52.50 $\pm$ 4.61 | 20.36 $\pm$ 4.51 | 3.55 $\pm$ 0.33                                   |

**Supplementary Table S1.** Wound sizes from representative wound healing assay at 12, 24 and 36 h time points and the number of dead cells after 48 h incubation with the studied compounds.

| 24 h  |                   |                  |                  |                  |
|-------|-------------------|------------------|------------------|------------------|
|       | Control           | 10 $\mu$ M Yoda1 | 1 $\mu$ M TG     | 5 $\mu$ M 2-APB  |
| GO/G1 | 73.82 $\pm$ 0.47  | 77.99 $\pm$ 0.20 | 83.01 $\pm$ 0.21 | 76.80 $\pm$ 0.25 |
| S     | 9.35 $\pm$ 0.24   | 8.13 $\pm$ 0.39  | 3.44 $\pm$ 0.09  | 8.51 $\pm$ 0.21  |
| G2M   | 16.81 $\pm$ 0.22  | 13.87 $\pm$ 0.18 | 13.53 $\pm$ 0.31 | 14.67 $\pm$ 0.03 |
| 48 h  |                   |                  |                  |                  |
| GO/G1 | 80.42 $\pm$ 1.02  | 78.63 $\pm$ 0.47 | 85.13 $\pm$ 0.64 | 80.87 $\pm$ 0.48 |
| S     | 7.27 $\pm$ 0.30   | 6.84 $\pm$ 0.62  | 2.83 $\pm$ 0.01  | 7.86 $\pm$ 0.36  |
| G2M   | 12.29 $\pm$ 12.29 | 14.52 $\pm$ 0.15 | 12.02 $\pm$ .64  | 11.26 $\pm$ 0.11 |

**Supplementary Table S2.** The phase distribution of the eMSCs treated with Yoda1, TG or 2-APB after 24 and 48 h. Data are presented as Mean %  $\pm$  S.D. (n=3).

**Supplementary Video 1.** Representative movies of eMSCs wound healing process in control and in the presence of 1  $\mu$ M TG, 10  $\mu$ M Yoda1 or 5  $\mu$ M 2-APB in the media. The total length of the experiment is 48 h, the time between frames is 2 h.
